# Supplementary material
Source: publisher figshare collection journal article supplement (https://asha.figshare.com/ndownloader/files/14554025)
Supplement: Supplementary file 1 [file 14554025]

**Supplemental Material S1.** Spearman's rank order correlations (Spearman's  $\rho$ ) between behavioral tinnitus variables (THI score, tinnitus pitch, tinnitus loudness) and BGDТ with measures of silent gap evoked P1-N1-P2 responses for the ChT group.

| Measure           | Amplitude |       |       |       |       |       |       |       | Latency |       |       |       |       |                                                  | Area                                           |        |       |
|-------------------|-----------|-------|-------|-------|-------|-------|-------|-------|---------|-------|-------|-------|-------|--------------------------------------------------|------------------------------------------------|--------|-------|
|                   | Thresh    |       |       |       | Supra |       |       |       | Thresh  |       |       | Supra |       |                                                  | Sub                                            | Thresh | Supra |
|                   | P1        | N1    | P2    | N1-P2 | P1    | N1    | P2    | N1-P2 | P1      | N1    | P2    | P1    | N1    | P2                                               |                                                |        |       |
| THI score         | -0.11     | -0.03 | 0.03  | 0.09  | -0.02 | -0.20 | -0.28 | -0.26 | 0.46    | -0.26 | -0.18 | -0.34 | -0.45 | -0.41                                            | -0.07                                          | 0.25   | -0.13 |
| Tinnitus pitch    | 0.11      | -0.08 | -0.24 | -0.13 | -0.53 | 0.28  | -0.46 | -0.47 | -0.10   | 0.19  | -0.16 | 0.09  | -0.06 | -0.08                                            | <b>-0.56</b><br><b>(<math>p = .046</math>)</b> | -0.54  | -0.38 |
| Tinnitus loudness | 0.01      | 0.01  | -0.11 | -0.01 | 0.04  | 0.03  | 0.17  | 0.07  | -0.18   | -0.32 | -0.55 | -0.27 | -0.34 | <b>-0.76</b><br><b>(<math>p = .003</math>)</b>   | -0.18                                          | -0.18  | 0.07  |
| BGDT              | -0.20     | -0.16 | -0.06 | 0.15  | -0.40 | -0.33 | -0.10 | 0.13  | -0.01   | 0.43  | 0.19  | -0.18 | 0.23  | <b>0.84</b><br><b>(<math>p &lt; .001</math>)</b> | -0.03                                          | 0.17   | -0.07 |

*Note.* Bolded text indicates significance at  $\alpha = .05$ ;  $\alpha$  level corrected for multiple comparisons = .001. *Spearman's  $\rho$*  = Spearman's rho; THI = Tinnitus Handicap Inventory (Newman, Jacobson, & Spitzer, 1996); BGDT = behavioral gap detection threshold; ChT = chronic tinnitus; Sub = subthreshold gap condition; Thresh = threshold gap condition; Supra = suprathreshold gap condition.

## Reference

Newman, C. W., Jacobson, G. P., & Spitzer, J. B. (1996). Development of the Tinnitus Handicap Inventory. *Archives of Otolaryngology—Head & Neck Surgery*, 122(2), 143–148.
